# Supplementary material for: Gonadal sex reversal in mutantDax1XY mice: a failure to upregulateSox9in pre-Sertoli cells
Source: Oxford University Press journal article supplement (doi:10.1242/dev.01890), 2005-06-08
Supplement: dev01890supptable1.pdf [file dev01890supptable1.pdf]

**Table S1. Primers used to identify genotypes**

| Target                              | Size   | Primers (5' to 3' direction)                          | PCR amplification cycle                                                                                                             |
|-------------------------------------|--------|-------------------------------------------------------|-------------------------------------------------------------------------------------------------------------------------------------|
| YMT2/B on Y chromosome              | 350 bp | F: CTGGAGCTCTACAGTGATGA<br>R: CAGTTACCAATCAACACATCAC  | 1 cycle: 95°C for 2 minutes, 34 cycles: 96°C for 10 seconds, 60°C for 30 seconds, 72°C for 30 seconds, 1 cycle: 72°C for 5 minutes  |
| Autosomal myogenin*                 | 250 bp | F: TTACGTCCATCGTGGACAGCAT<br>R: TGGGCTGGGTGTTAGTCTTAT | *                                                                                                                                   |
| <i>Sry</i> <sup>129</sup> transgene | 400 bp | F: CTCAGTGTGGAATTCATCTGC<br>R: GAGGGCATGGTCAGTTGAAC   | 1 cycle: 95°C for 2 minutes, 34 cycles: 96°C for 10 seconds, 60°C for 30 seconds, 72°C for 30 seconds, 1 cycle: 72°C for 5 minutes  |
| Sxr <sup>†</sup>                    | 377 bp | F: TGGTGAGCATAACCATACC<br>R: TTGCTGTCTTTGTGCTAGCC     | 1 cycle: 95°C for 2 minutes, 34 cycles: 96°C for 30 seconds, 57°C for 30 seconds, 72°C for 30 seconds, 1 cycle: 72°C for 10 minutes |
| Tg93 (Zp3-Cre)                      | 450 bp | F: TGATGAGGTTCGCAAGAACC<br>R: CCATGAGTGAACGAACCTGG    | 1 cycle: 94°C for 3 minutes, 39 cycles: 94°C for 30 seconds, 62°C for 30 seconds, 72°C for 45 seconds, 1 cycle: 72°C for 10 minutes |
| <i>Dax1</i> + <sup>‡</sup>          | 150 bp | F: CCTTAGAAGTGTTGCTTCTG<br>R: ACAGCTCACCACAGGATCTT    | 1 cycle: 95°C for 10 minutes, 34 cycles: 96°C for 15 seconds, 58°C for 30 seconds, 72°C for 1 minutes, 1 cycle: 72°C for 5 minutes  |
| <i>Dax1</i> <sup>flox‡</sup>        | 200 bp | F: CCTTAGAAGTGTTGCTTCTG<br>R: ACAGCTCACCACAGGATCTT    | ‡                                                                                                                                   |
| <i>Dax1</i> - <sup>‡</sup>          | 300 bp | F: CCTTAGAAGTGTTGCTTCTG<br>R: GCACATTGTTCTGAGTGGCT    | ‡                                                                                                                                   |

\*Amplification of the autosomal myogenin gene was performed in multiplex PCR reactions as a control for detection of the presence of a Y chromosome, *Sry*<sup>129</sup> transgene and Tg93.

<sup>†</sup>Following amplification the PCR product was digested with *Nla*IV as previously described (Albrecht et al., 2003). Undigested fragment indicates presence of Sxr, whereas presence of two co-migrating bands of ~188 bp indicates presence of *Sry*<sup>AKR</sup>.

<sup>‡</sup>The presence of *Dax1*+, *Dax1*<sup>flox</sup> and *Dax1*- alleles was determined in a multiplex PCR reaction.
