# Supplementary material for: Gonadal sex reversal in mutantDax1XY mice: a failure to upregulateSox9in pre-Sertoli cells
Source: Oxford University Press journal article supplement (doi:10.1242/dev.01890), 2005-06-08
Supplement: dev01890supptable3.pdf [file dev01890supptable3.pdf]

**Table S3. Summary of multiple QTL modeling**

| Chromosome and<br>approximate cM<br>position | df | Type III SS | LOD   | % Variance | F-value | <i>P</i> -value (F) |
|----------------------------------------------|----|-------------|-------|------------|---------|---------------------|
| Chr1 @38                                     | 2  | 7.441       | 6.968 | 20.689     | 17.587  | 2.07e-007           |
| Chr4@64                                      | 1  | 2.574       | 2.621 | 7.157      | 12.167  | 0.000684            |
| Chr8@28                                      | 2  | 3.578       | 3.578 | 9.948      | 8.457   | 0.000370            |
| Chr1 @38:Chr8@28                             | 1  | 3.249       | 3.268 | 9.032      | 15.356  | 0.000150            |
| Total                                        | 4  | 10.784      | 9.520 | 29.984     |         |                     |

\*Type III SS is the adjusted sum-of-squares attributable to each term in the regression after accounting for all other terms. SS for a main effect term that is involved in an interaction includes the interaction component.
